# Supplementary material for: Efficient charge separation and transportation using 1D iron-sulfide@titania heterojunctions as photoanodes for improved interface stability and photoelectrochemical activity to produce hydrogen
Source: Royal Society of Chemistry journal article supplement (doi:10.1039/d3nj04753a), 2024-01-01
Supplement: d3nj04753a1.pdf [file d3nj04753a1.pdf]

## Supplementary Information

### **Efficient Charge Separation and Transportation Using 1D Iron-Sulfide@Titania Heterojunctions as Photoanode for Improved Interface Stability and Photoelectrochemical Activity**

Noor Alam<sup>a</sup>, Fazeelat Rehman<sup>a</sup>, Manzar Sohail<sup>a</sup>, Asad Mumtaz <sup>a,\*</sup>

<sup>a</sup> Department of Chemistry, School of Natural Sciences (SNS), National University of Sciences & Technology (NUST), H-12, Islamabad, 44000, Pakistan

#### **Corresponding author:**

Dr. Asad Mumtaz,

Assistant Professor,

Department of Chemistry,

School of Natural Sciences (SNS),

National University of Sciences & Technology (NUST), H-12, 44000, Islamabad, Pakistan

**Mobile:** +923325190321 | **Office:** +92 51 90855593

**E-mail:** asad\_032@yahoo.com | asad.mumtaz@sns.nust.edu.pk

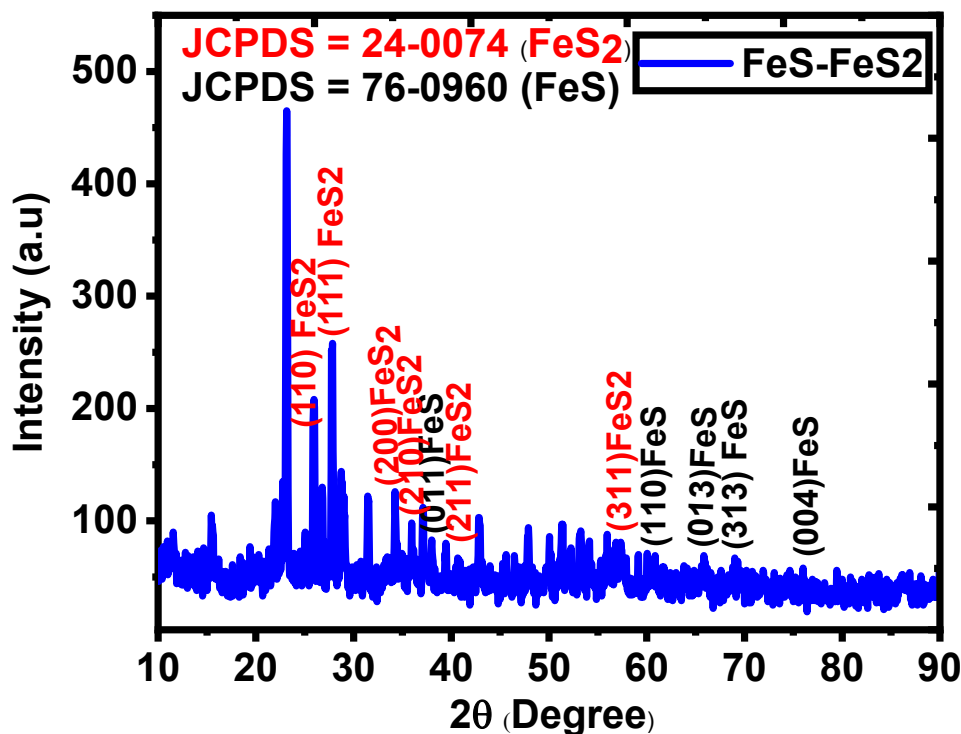

**Figure S1. XRD of 50 SILAR cycles of FeS-FeS<sub>2</sub>**

Figure S1, indicates the presence of FeS and FeS<sub>2</sub> phases in the sample prepared at the substrate in bulk with 50 SILAR cycles. Briefly, FeS possesses 2θ values of 38.03°, 60.83°, 65.86°, 69.06°, 76.10° which corresponds to (011), (110), (013), (313), and (004), while for FeS<sub>2</sub> the 2θ = 25.01°, 27.95°, 34.34°, 35.94°, 39.86° and 57.18° corresponds to (110), (111), (200), (210), (211) and (311) respectively. After matching the 2θ value of FeS-FeS<sub>2</sub> with FeS-FeS<sub>2</sub>@TiO<sub>2</sub>, it was observed that the peaks intensity decreased and little shifting in it has been occurred at the 2θ = 38.03°, 76.10° which corresponds to (011), (004) planes as of FeS and 2θ = 25.01, 39.86° which corresponds to (110), (211) planes as of FeS<sub>2</sub> respectively, which confirms the successful deposition of FeS-FeS<sub>2</sub> at TiO<sub>2</sub> with low amount.

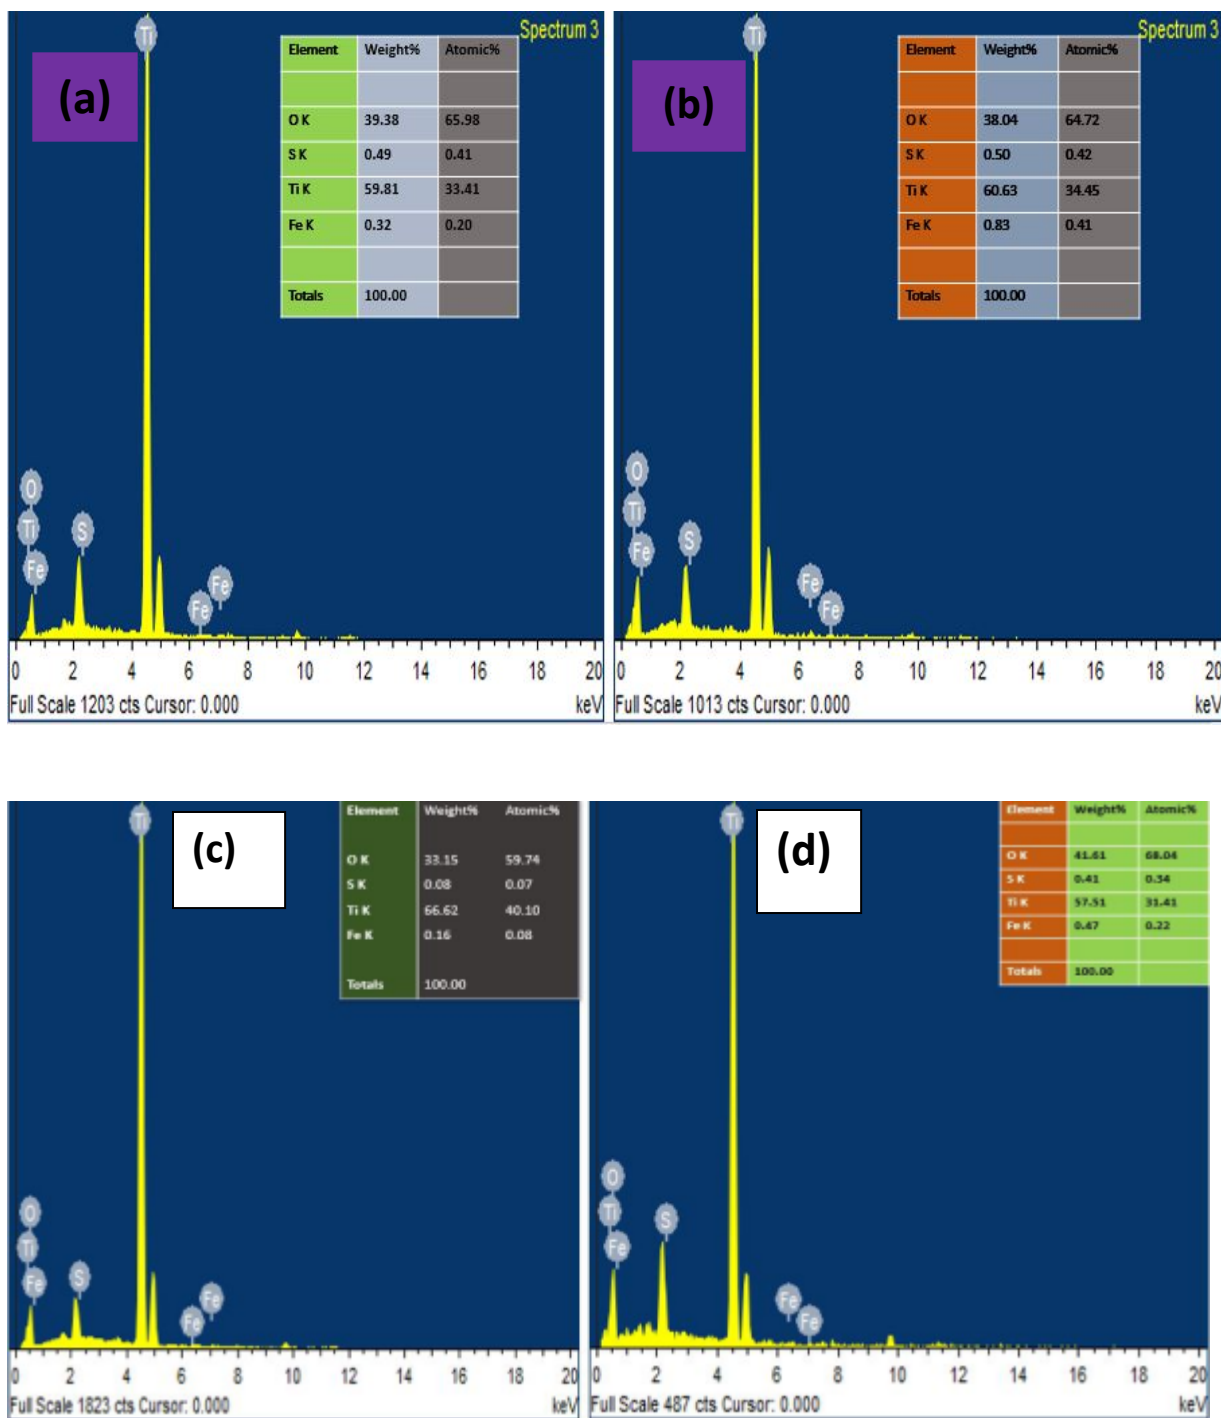

**Figure S2. EDS spectrum of (a) 10-FeS-FeS<sub>2</sub>@TiO<sub>2</sub> NTs (b) 15-FeS-FeS<sub>2</sub>@TiO<sub>2</sub> NTs, (c) 10-FeS-FeS<sub>2</sub>@TiO<sub>2</sub> NTs and (d) 15-FeS-FeS<sub>2</sub>@TiO<sub>2</sub> NTs**

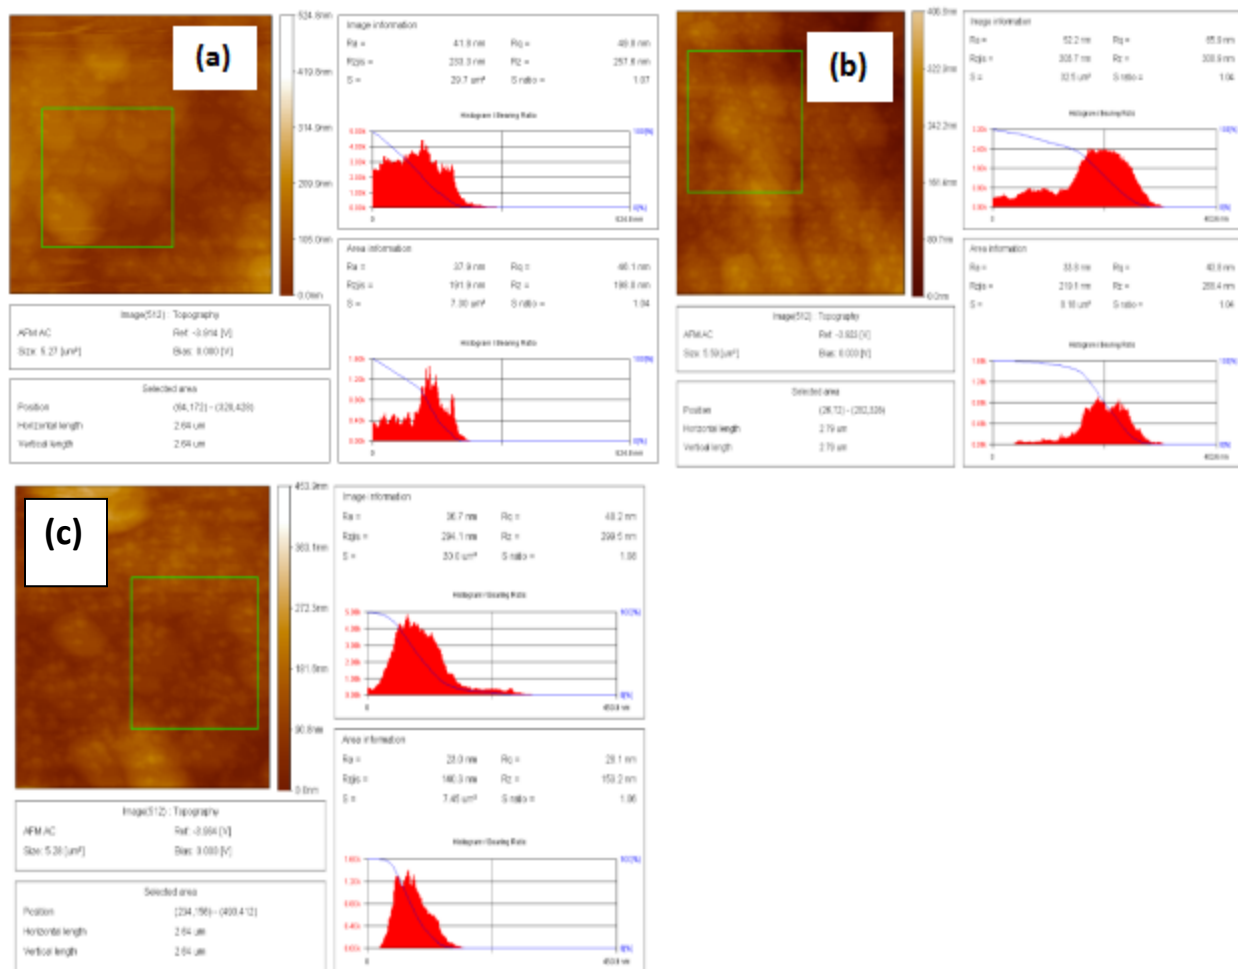

**Figure S3 AFM images showing surface roughness of (a) pure  $\text{TiO}_2$  NTs (b) 10-FeS- $\text{FeS}_2$ @ $\text{TiO}_2$  NTs (c) 15-FeS- $\text{FeS}_2$ @ $\text{TiO}_2$  NTs**

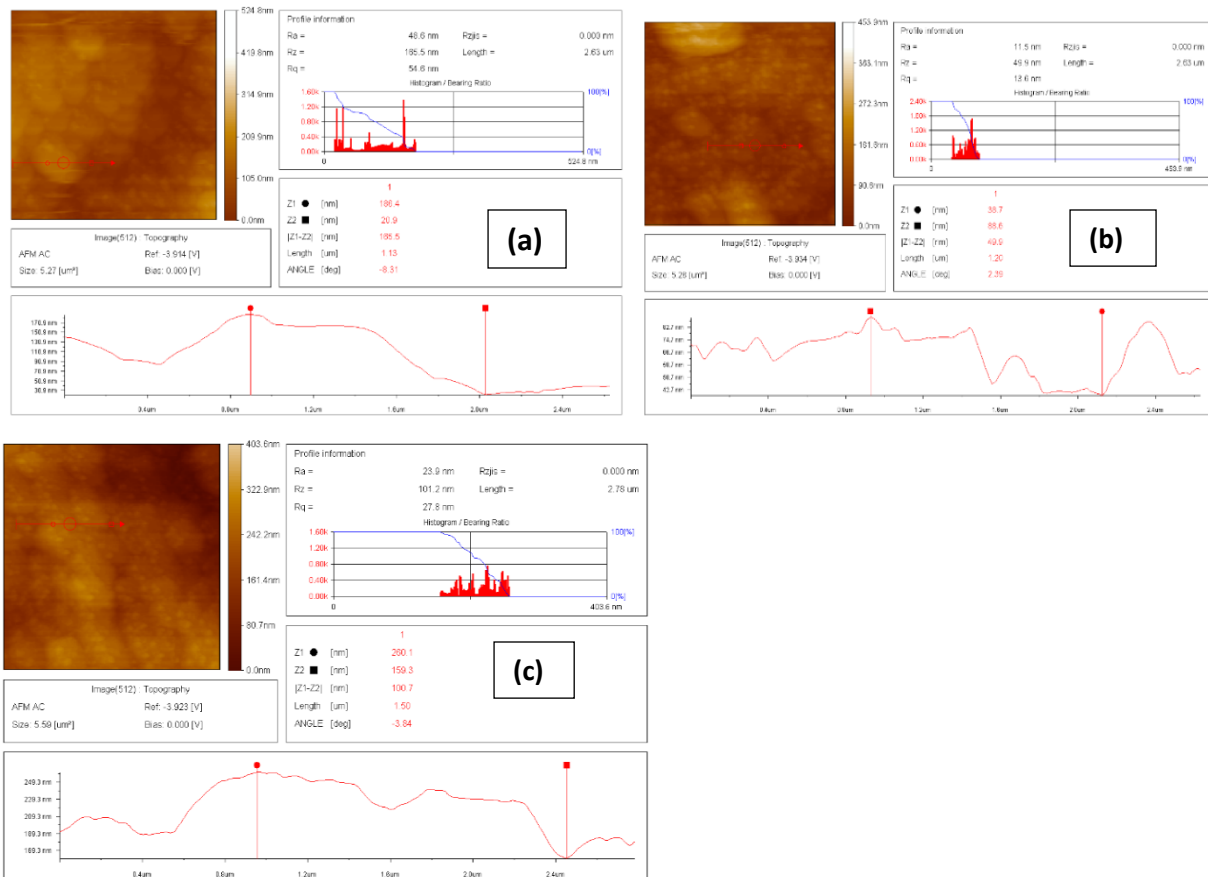

**Figure S4 AFM images showing surface thickness of (a) pure  $\text{TiO}_2$  NTs, (b) 10-FeS- $\text{FeS}_2$ @ $\text{TiO}_2$  NTs and (c) 15-FeS- $\text{FeS}_2$ @ $\text{TiO}_2$  NTs**

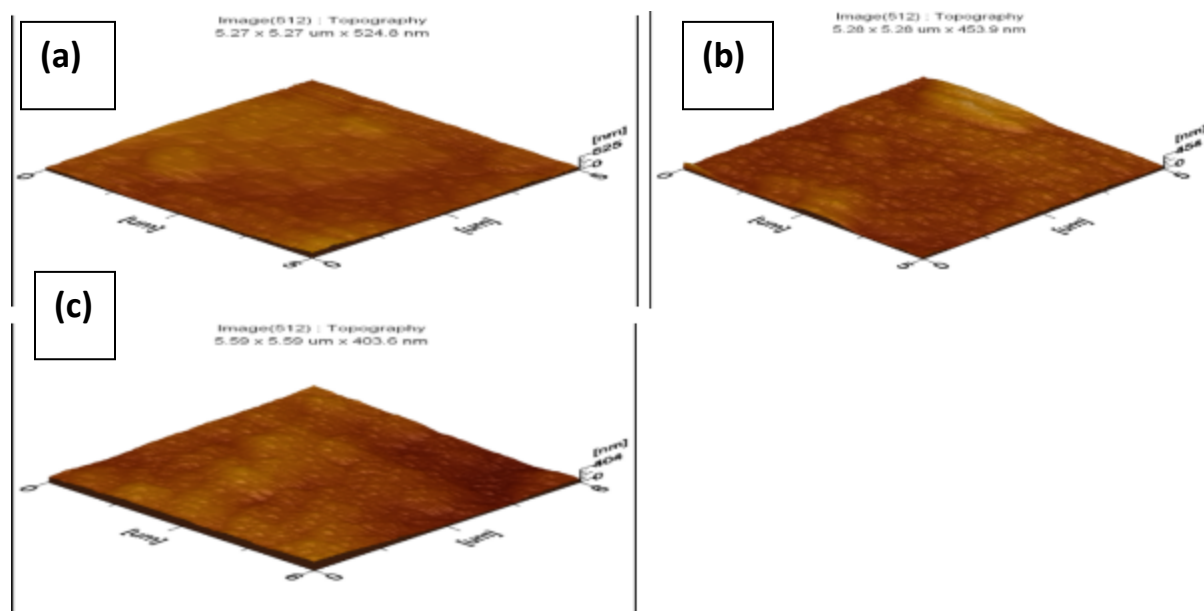

Figure S5 AFM images showing topography of (a) pure  $\text{TiO}_2$  NTs (b) 10-FeS-FeS<sub>2</sub>@TiO<sub>2</sub> NTs (c) 15-FeS-FeS<sub>2</sub>@TiO<sub>2</sub> NTs

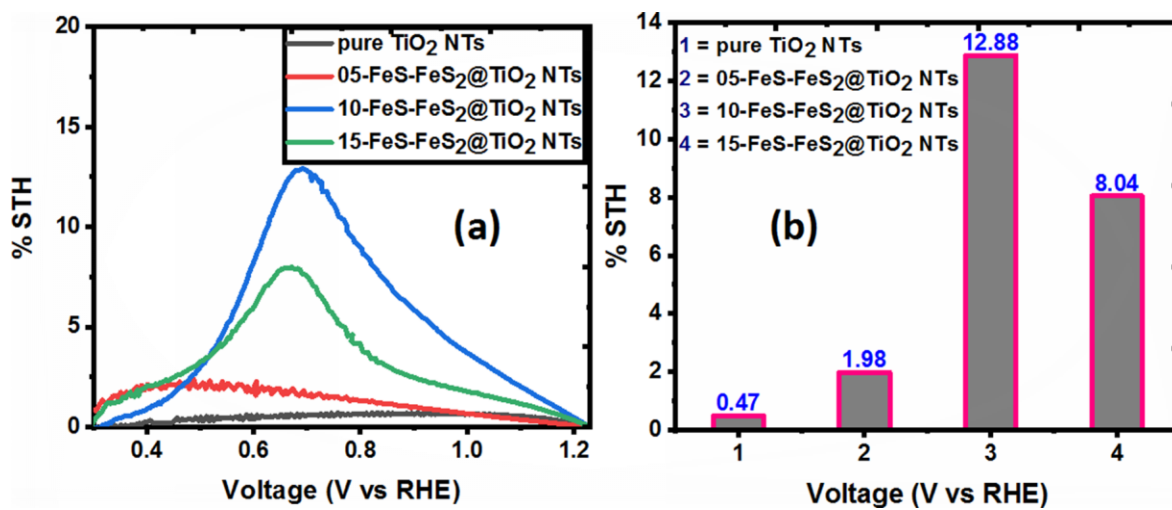

Figure S6. (a) %STH curves (b) %STH Histogram of pure  $\text{TiO}_2$  NTs, 05-FeS-FeS<sub>2</sub>@TiO<sub>2</sub> NTs, 10-FeS-FeS<sub>2</sub>@TiO<sub>2</sub> NTs and 15-FeS-FeS<sub>2</sub>@TiO<sub>2</sub>@TiO<sub>2</sub> NTs

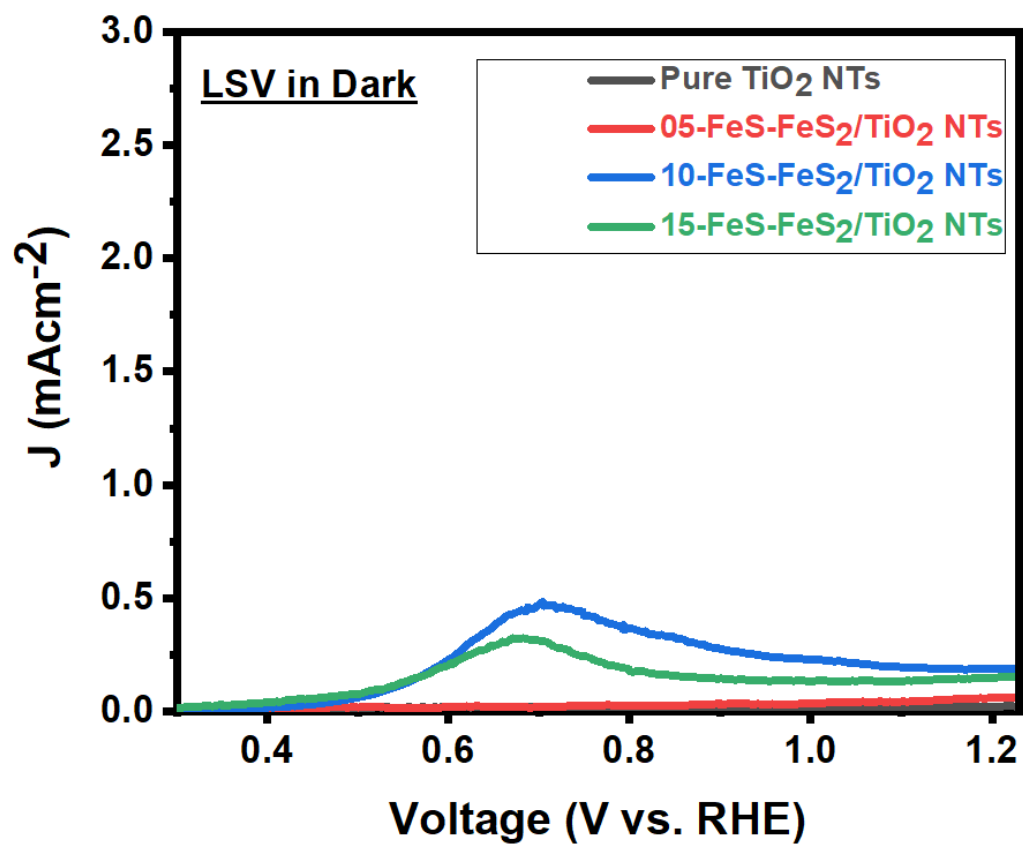

Figure S7. Linear Sweep Voltammetry (I-V) curves in dark
